1  
2  
3  
4  
5  
6  
7  
8  
9  
10  
11  
12  
13  
14  
15  
16  
17  
18  
19  
20  
21  
22  
23

**Data-Driven Prediction of CRISPR-Based Transcription Regulation for Programmable  
Control of Metabolic Flux**

Jiayuan Sheng<sup>†</sup>, Weihua Guo<sup>†</sup>, Christine Ash, Brendan Freitas, Mitchell Paoletti, and Xueyang  
Feng<sup>\*</sup>

Department of Biological Systems Engineering, Virginia Polytechnic Institute and State  
University, Blacksburg, VA 24061

<sup>†</sup> WG and JS are equally contributed.

<sup>\*</sup> To whom correspondence should be addressed. X.F: Phone: (540) 231-2974. E-mail:  
xueyang@vt.edu.

1 **Abstract**

2           Multiplex and multi-directional control of metabolic pathways is crucial for metabolic  
3 engineering to improve product yield of fuels, chemicals, and pharmaceuticals. To achieve this  
4 goal, artificial transcriptional regulators such as CRISPR-based transcription regulators have  
5 been developed to specifically activate or repress genes of interest. Here, we found that by  
6 deploying guide RNAs to target on DNA sites at different locations of genetic cassettes, we  
7 could use just one synthetic CRISPR-based transcriptional regulator to simultaneously activate  
8 and repress gene expressions. By using the pairwise datasets of guide RNAs and gene  
9 expressions, we developed a data-driven predictive model to rationally design this system for  
10 fine-tuning expression of target genes. We demonstrated that this system could achieve  
11 programmable control of metabolic fluxes when using yeast to produce versatile chemicals. We  
12 anticipate that this master CRISPR-based transcription regulator will be a valuable addition to  
13 the synthetic biology toolkit for metabolic engineering, speeding up the “design-build-test” cycle  
14 in industrial biomanufacturing as well as generating new biological insights on the fates of  
15 eukaryotic cells.

16

## 1 **Introduction**

2           Metabolic engineering has proven to be tremendously important for sustainable  
3 production of fuels<sup>1,2</sup>, chemicals<sup>3,4</sup>, and pharmaceuticals<sup>5,6</sup>. One of the critical steps in metabolic  
4 engineering is reprogramming metabolic fluxes in host cells to optimize the fermentation  
5 performance such as product yield<sup>7,8</sup>. To achieve this goal, several enzymes need to be activated  
6 while in the meantime others need to be repressed<sup>9</sup>. The multiplex and multi-directional control  
7 of enzyme expressions is largely executed through transcriptional regulation<sup>9-12</sup>. Recently, the  
8 type-II clustered regularly interspaced short palindromic repeats (CRISPR)/Cas9 from  
9 *Streptococcus pyogenes* (*Sp*)<sup>13-15</sup> has been repurposed to be a master transcriptional regulator that  
10 could activate or repress multiple genes<sup>16-18</sup>. By further extending the guide RNAs of SpCas9 to  
11 include effector protein recruitment sites and expressing the effector proteins in host cells<sup>18,19</sup>, a  
12 synthetic CRISPR-based transcriptional regulator was developed to simultaneously program the  
13 expressions of multiple genes at multiple directions (i.e., both activation and repression).

14           Although demonstrating great promises in controlling metabolic fluxes, the current  
15 CRISPR-based transcription regulation faces several challenges when being applied for  
16 metabolic engineering. First, it relies on a panel of well-characterized genetic parts (e.g., RNA-  
17 binding proteins) to achieve the transcriptional regulation<sup>9,20</sup>. However, the rareness of such  
18 genetic parts often limits the application of current CRISPR-based transcription regulator in a  
19 metabolic network. Second, it requires the co-expression of effector proteins to activate or  
20 repress the target genes<sup>9,20</sup>. Therefore, the utility of current CRISPR-based transcription  
21 regulator in metabolic engineering is mitigated by the metabolic costs associated with protein  
22 expressions<sup>9,20</sup>. To address these limitations, an ideal type of CRISPR-based transcription  
23 regulation should meet two criteria: generally applicable in any gene of interest, and requiring

1 minimal protein expression to achieve multi-directional gene regulation.

2 In this study, we have developed a data-driven approach that enables the rational design  
3 of a new type of CRISPR-based transcription regulation. This CRISPR-based transcription  
4 regulator uses only a fused protein of a nuclease-deficient Cas9 (dCas9) and an effector (VP64)  
5 to achieve multi-directional and multiplex gene regulation, which eliminates the metabolic costs  
6 associated with the expression of effector proteins in previous studies<sup>9,20</sup>. We found that the  
7 deployment of guide RNAs was the key factor that determined the regulatory effects of our  
8 CRISPR-based transcription regulator. We used a data-driven approach to provide accurate and  
9 target-oriented guidance on designing the guide RNAs. As we showed in our results, this  
10 approach could be applied for any gene of interest. Finally, using this system, we demonstrated a  
11 highly programmable control of metabolic fluxes when using yeast to produce versatile  
12 chemicals.

13

## 14 **Results**

### 15 **Gene activation and repression by using a CRISPR-based transcriptional regulator.**

16 The CRISPR-based transcriptional regulator is composed of a codon-optimized, catalytically  
17 dead SpCas9 (i.e., dCas9) that is fused with four tandem copies of Herpes Simplex Viral Protein  
18 16 (VP64, a commonly used eukaryotic transcription activator domain). The similar molecular  
19 design was previously reported to be able to activate gene expression in yeast<sup>18</sup> and mammalian  
20 cells<sup>18</sup>. In brief, it was found that when the dCas9-VP64 regulator was positioned in the correct  
21 sites of promoter, the target gene could be activated by the VP64. However, we hypothesized that  
22 the effects of dCas9-VP64 could be diverse, i.e., both activation and repression could be  
23 achieved by using this master regulator (Fig. 1A). For example, the transcription initiation could



1 be blocked when dCas9-VP64 is deployed to the transcription starting sites (TSS). The  
2 transcription elongation could also be inhibited when dCas9-VP64 is deployed to the open  
3 reading frame (ORF). If the hypothesis stands, we could then repurpose dCas9-VP64 as a  
4 universal regulator to activate and repress gene expressions at the same time.

5 To validate our hypothesis, we designed experiments by selecting 138 sites that can be  
6 targeted by dCas9-VP64 in four synthetic genetic cassettes (Fig. 1B): GFP under TEF1p  
7 promoter, mCherry under TPI1p promoter, Sapphire under PGK1p promoter, and Venus under  
8 PDC1p promoter. We created a library of guide RNAs and co-expressed them with the dCas9-  
9 VP64 and the target genetic cassette. For each of the tests, we measured the fluorescence of the  
10 reporter proteins and compared it to a control test in which dCas9-VP64 and the genetic cassette  
11 were expressed without guide RNA. As summarized in Fig. 1B and Fig. 1C, expression of  
12 reporter genes could indeed be programmed to be either up- or down-regulated (cutoff fold-  
13 change set as two-fold,  $p < 0.05$ ) when positioning the guide RNA at different sites on the  
14 promoter or ORF. The dynamic range of transcriptional regulation via dCas9-VP64 varied for  
15 different genetic elements, with the largest dynamic range achieving 13.8-fold (from -1.14 to  
16 2.65 of  $\log_2$  gene fold-change) in expression of TPI1p-mCherry cassette and the smallest  $\log_2$   
17 fold change dynamic range achieving 11.6-fold (from -1.82 to 1.71 of  $\log_2$  gene fold-change) in  
18 expression of PGK1p-Venus cassette. We next compared the effects on transcriptional regulation  
19 when guide RNAs were positioned in the promoter region to that were positioned in the gene  
20 region (Fig. 1D). A significant difference ( $p < 0.01$ ) was revealed: while gene expression was in  
21 general down-regulated when guide RNAs were positioned in the gene region, most of the guide  
22 RNAs (94.2%) that were positioned in the promoter region led to gene up-regulation or no effect.  
23 We also evaluated whether different PAM sites (i.e., 3'AGG, 3'TGG, 3'CGG, 3'GGG) could

1 bias the transcriptional regulation (Fig. 1E). We found that most of the PAM sites (3'AGG,  
2 3'TGG, 3'CGG) have no bias, but when guide RNAs were targeted on 3'GGG sites, the  
3 expression of selected genes tends to be more up-regulated than other PAM sites ( $p < 0.05$ ). Such  
4 difference, as we discussed in the section below, may be attributed to the larger percentage of  
5 guanosine in 3'GGG sites. Finally, we evaluated the metabolic costs of dCas9-VP64 by  
6 comparing the growth rates of yeast between the ones subject to transcriptional regulation (i.e.,  
7 with guide RNAs) and the ones that were not. As shown in Fig. S1, 131 out of the 138 tests  
8 showed no significant difference ( $p > 0.05$ ) on cell growth rate when being compared to that of the  
9 control strain, indicating a minimal metabolic burden when using only one synthetic protein for  
10 transcriptional regulation.

11 **Data-driven model of transcriptional regulation by using dCas9-VP64.** To determine  
12 the rule underlying transcriptional regulation by dCas9-VP64, we solicited nine design  
13 parameters on nucleotide stability, sequence of the target genetic element, PAM site location, and  
14 protein-DNA structure. These design parameters were chosen based on previous studies on the  
15 activity of SpCas9<sup>21,22</sup>. Next, we correlated these design parameters with transcriptional  
16 regulation (Fig. S2A), and calculated the Pearson's correlation coefficients (PCC). The top 3  
17 correlated design parameters were location, GC content (GC%), and PAM site of GGG. Next, we  
18 aimed to develop a predictive model that could use the design parameters to describe the effects  
19 of guide RNAs positioning on gene expressions. Our first attempt is a linear regression model,  
20 which utilized all the nine design parameters (i.e., GC%, location, number of base G, number of  
21 base A,  $\Delta G$ , AGG, TGG, CGG, and GGG) to simulate the corresponding fold changes of gene  
22 expressions as we collected from the four synthetic genetic cassettes (Fig. S2B). However, the  
23 fitting of the linear regression model was very bad, as demonstrated by the low PCC (0.41)

1 between observed and simulated fold changes (Fig. S2B). This clearly indicated that the  
2 biomolecular interactions of RNA-protein and DNA-protein in the dCas9-VP64 system were  
3 highly nonlinear, which cannot be captured by the simple linear regression model.

4 We then used machine learning to derive an empirical model to quantitatively predict the  
5 nonlinear correlation between design parameters and transcriptional regulation by dCas9-VP64.  
6 As a data-driven modeling approach, machine learning is advantageous than linear model in  
7 solving complex problems in two aspects<sup>23-25</sup>: requiring no *a priori* knowledge of the system,  
8 and capable of resolving complex systems with high non-linearity and multi-dimensionality. In  
9 this study, we used the pairwise data of the design parameters of guide RNAs and the  
10 corresponding fold-change of gene expressions to train the computer for developing a  
11 mathematical model that could accurately predict the causal effects of inputs (i.e., regulated gene  
12 expression in this study). We used decision tree method to build a machine-learning algorithm  
13 and adopted ten-fold cross validation to evaluate the prediction accuracy of our model. The  
14 model construction and model evaluation were conducted by following a toolkit developed in  
15 MATLAB<sup>TM</sup> (i.e., “*fitrtree*” and “*predict*” in Statistics and Machine Learning Toolbox), which  
16 automatically adjust the nodes and connections of the decision tree to optimize the fitting<sup>26,27</sup>.  
17 Using the 138 pairwise data collected from the synthetic genetic cassettes (i.e., TEF1p-GFP,  
18 TPI1p-mCherry, PDC1p-Sapphire, and PGK1p-Venus), we found that the prediction accuracy  
19 was dramatically improved with PCC reaching 0.80 (Fig. 2B) for overall prediction of gene  
20 regulation and 0.72~0.93 for predicting gene regulation of individual genetic cassettes (Fig. 2C).  
21 Also, we found that the prediction accuracy of our machine-learning algorithm was improved  
22 with the enlargement of data size (Fig. 2D). For example, when 20 pairwise datasets were chosen,  
23 the PCC was merely 0.66. However, when the number of pairwise datasets reached 80, the PCC

1 was improved to 0.78. This demonstrated the unique advantage of data-driven algorithm, i.e.,  
2 increased prediction accuracy with more data.

3 To further test if our machine-learning algorithm could be generally applied for  
4 predicting the transcriptional regulation of other genes, we designed another synthetic genetic  
5 cassette that expressed tdTomato under Eno2p promoter. We used the machine-learning  
6 algorithm to predict the regulated gene expressions when guide RNAs of dCas9-VP64 were  
7 positioned at different locations of Eno2p-tdTomato cassette, followed by constructing the  
8 genetic cassettes and conducting experimental measurements. Of the 99 guide RNAs tested, our  
9 machine-learning algorithm could achieve similarly high prediction accuracy with PCC between  
10 the predicted and the measured gene expressions reaching 0.87 (Fig. 2E). This success  
11 demonstrated that our data-driven model could be generally applicable to guide the biomolecular  
12 design of dCas9-VP64 system to achieve customized gene regulation.

13 We also packaged our machine-learning algorithm into an open-source toolbox (Fig. S3  
14 and supplementary software), CRISTINES (CRISPR-Cas9 Transcriptional Inactivation and  
15 Elevation System), which is a MATLAB-based toolbox and free for downloading at  
16 <https://sites.google.com/a/vt.edu/biomolecular-engineering-lab/software>. CRISTINES is able to  
17 analyze the input DNA sequences, identify the design parameters of the dCas9-VP64 system,  
18 and use the embedded decision-tree algorithm to provide the top five guide RNAs that would  
19 lead to the strongest up-regulation and down-regulations, respectively. We anticipated that  
20 CRISTINES could help biologists worldwide to customize their design based on the target gene  
21 of interest.

22 **Design dCas9-VP64 to reprogram metabolic fluxes in yeast.** We next applied dCas9-  
23 VP64 system in yeast metabolic engineering to test if the metabolic fluxes could be flexibly

1 reprogrammed using our CRISPR-based transcription regulator. We chose the highly branched  
2 bacterial violacein biosynthetic pathway as our model pathway<sup>28</sup> (Fig. 3A), which uses five  
3 enzymes (VioA, VioB, VioE, VioD, and VioC) to produce four high-value products (violacein,  
4 proviolacein, deoxyviolacein, and prodeoxyviolacein). By controlling the expression levels of  
5 the five enzymes, the metabolic fluxes flowing into different branch pathways could be varied  
6 and thus leading to different yield of the four products. In this study, we reconstituted the  
7 violacein pathway in yeast by expressing the five enzymes under constitutive promoters (i.e.,  
8 TEF1p, PGK1p, ENO2p, TPI1p, and PDC1p). According to our data-driven model CRISTINES,  
9 we could computationally predict the gene expression and thus predict the metabolic fluxes in  
10 the violacein pathway. Here, we designed three guide RNAs for four genes in the violacein  
11 pathway (VioA, VioE, VioD, and VioC). These three guide RNAs targeted on different promoter  
12 sites and were predicted to result in high, medium and low expression of each target gene,  
13 respectively. Correspondingly, the functional output states of the violacein pathway were  
14 predicted to vary. For example, up-regulating VioA and down-regulating VioD would increase  
15 the fluxes into deoxyviolacein and prodeoxyviolacein, but decrease the fluxes into violacein and  
16 proviolacein. To validate our predictions on metabolic flux reprogramming, we co-expressed the  
17 dCas9-VP64 system with the violacein pathway, and used various guide RNAs to fine tune gene  
18 expressions. For each of the tests, we measured the titer of violacein, proviolacein,  
19 deoxyviolacein, and prodeoxyviolacein produced by yeast. As shown in Fig. 3B and 3C, our  
20 prediction fit well with the experimental measurements, with PCC reaching 0.84. We noticed  
21 some of the predictions on metabolic fluxes were not as good as we expected. This could be  
22 attributed to the posttranscriptional regulation of the five enzymes in the violacein pathway.  
23 Overall, we demonstrated that our master CRISPR-based transcription regulator was indeed able

1 to program metabolic fluxes. More importantly, our data-driven algorithm allows users to design  
2 metabolic pathways with deterministic fates *in silico*.

3

#### 4 **Discussion**

5 Using data-driven approach to investigate biomolecular interactions of CRISPR-based  
6 systems has recently been showcased in several studies, such as rational design of guide RNAs  
7 for maximizing editing activity and minimizing off-target effects of SpCas9<sup>29,30</sup>. This approach is  
8 advantageous compared to conventional deterministic models because it does not require *a priori*  
9 knowledge on the mechanisms of RNA-protein and DNA-protein interactions<sup>31,32</sup>, which still  
10 remains largely unknown in spite of numerous studies on SpCas9 structures<sup>33-37</sup>. Also, because  
11 the biomolecular interactions among Cas9 protein and nucleic acids are highly nonlinear, the  
12 linear regression model cannot capture the essence of CRISPR-based transcription regulation. As  
13 shown in our results, a machine-learning method could overcome this issue and capture the  
14 nonlinearity of the model. Not only did we achieve high accuracy when predicting the regulatory  
15 effects of CRISPR-based transcription regulator, but we also demonstrated that this method was  
16 not specific to a few selected genes and could be generally applicable. Future work will  
17 determine if the results obtained from yeast could provide useful lessons in other eukaryotic  
18 systems such as mammalian cells.

19 We expect that our method will provide a valuable tool for metabolic engineering,  
20 especially yeast metabolic engineering at this stage. *S. cerevisiae* is a widely used industrial  
21 workhorse for producing a broad spectrum of chemicals that represents over quarter trillion  
22 dollars market<sup>38</sup>. The experimental and analytical approaches described here raise the possibility  
23 of genome-scale reprogramming of metabolic fluxes, which will dramatically speed up the

1 “design-build-test” cycle in industrial biomanufacturing<sup>39</sup>. We also expect our method could be  
2 used to rewire the fate of yeast cells, such as cell cycle, and thus generate new biological insights  
3 on the fundamentals of metabolic diseases, aging and apoptosis by using yeast as a disease model.  
4

## 5 **Methods**

6 **Strain and plasmid construction in *Saccharomyces cerevisiae*.** dCas9 was codon-optimized  
7 for expression in *S. cerevisiae* and cloned into a pRS413 backbone under control of the GAL1  
8 promoter. The RNA-guided transcription factors were built by fusing four repeats of the minimal  
9 domain of the herpes simplex viral protein 16 (VP16) to the C-terminus of dCas9  
10 (dCas9\_VP64)<sup>18</sup>. The reporter genes eGFP under the control of the TEF1p promoter, sapphire  
11 under PDC1p, mCherry under TPI1p, and venus under PGK1p were cloned into pRS416 plasmid  
12 by using the DNA assembler method<sup>40,41</sup>. The reporter plasmid for verification was built by  
13 cloning tdTomato under the control of ENO2p into pRS416 plasmid. To build gRNA-expressing  
14 plasmids, empty gRNA expressing vectors were first made by cloning the pRPR1 promoter (an  
15 RNA-polymerase-III-dependent promoter), the gRNA handle (flanked by HindIII and XhoI  
16 sites), and the RPR1 terminator into the SacI and KpnI sites of the pRS425 plasmid. Sequences  
17 of the constructs that were used in this study were listed in Table S1. Strains constructed in this  
18 study were listed in Table S2.

19 **Fluorescence Assays.** To assess expression of the reporter constructs, yeast cells expressing  
20 different gRNAs (or no gRNA as control) were grown overnight (250 rpm, 30°C) in 3 mL SC  
21 medium supplemented with glucose with appropriate selection (three independent cultures for  
22 each sample). Ten microliters of these cultures were then transferred into fresh media,  
23 supplemented with galactose and grown for 20 h (250 rpm, 30°C) before analysis by plate

1 reader. The wave lengths of the different reporter genes are eGFP:  $\lambda_{\text{ex}}$  488 nm,  $\lambda_{\text{em}}$  507nm;  
2 Sapphire:  $\lambda_{\text{ex}}$  399 nm,  $\lambda_{\text{em}}$  511nm; Venus  $\lambda_{\text{ex}}$  515 nm,  $\lambda_{\text{em}}$  528nm; tdTomato  $\lambda_{\text{ex}}$  554 nm,  $\lambda_{\text{em}}$   
3 581nm; mCherry  $\lambda_{\text{ex}}$  587 nm,  $\lambda_{\text{em}}$  610 nm. All of the fold-changes of the synthetic genetic  
4 cassettes, including the four cassettes for model training and the ENO2p-tdTomato cassette for  
5 model validation, were listed in Table S3 and Table S4.

6 **Qualitative analysis of key parameters.** The exponential fold changes of different gRNA  
7 designs have been separated into two categories, the promoter region (location  $< 0$ ,  $n = 52$ ) and  
8 the gene coding region (location  $> 0$ ,  $n = 86$ ). The unpaired two-tail t-test was used to calculate  
9 the significance of the fold changes between these two groups. For the analysis of the PAM type,  
10 the same t-test was used for each PAM types ( $n_{\text{AGG}} = 42$ ,  $n_{\text{TGG}} = 69$ ,  $n_{\text{CGG}} = 21$ ,  $n_{\text{GGG}} = 6$ ).

11 **Modeling.** The multiple linear regression model was implemented by the “*regress*” command in  
12 MATLAB. To evaluate the prediction power, the ten-fold cross validation was implemented for  
13 the linear model. The Pearson’s correlation coefficient between observed and predicted fold  
14 changes was calculated by MATLAB. The binary regression decision tree model was developed  
15 by using “*fitrtree*” command in MATLAB with all the default setting of options. The details of  
16 the decision tree model were shown in Table S5. The ten-fold cross validation was implemented  
17 for this model with the same manner. A detailed tutorial of CRISTINES was included in the  
18 supplementary information.

19 **Ten-fold cross validation.** All the datasets from the four synthetic genetic cassettes ( $n = 151$ )  
20 were randomly divided into ten folds (nine folds with 15 datasets each and one-fold with 16  
21 datasets). Nine of the ten folds were used as training datasets, and the one-fold remaining was  
22 used as validation datasets. By iteratively repeating the above process for ten times, all the folds



1 could be used as validation datasets. The Pearson's correlation coefficient between the observed  
2 fold changes and predicted fold changes of were calculated by MATLAB.

3 **Analysis of products from violacein pathway.** Yeast strains for violacein biosynthesis were  
4 constructed and product distributions were analyzed as described previously with minor  
5 modifications. The parent yeast strain for these experiments was BY4741. The five-gene cassette  
6 of violacein pathway was constructed using the DNA assembler method: VioA under TEF1p;  
7 VioB under PGK1p; VioC under ENO2p; VioD under TPI1p and VioE under PDC1p. Yeast  
8 strains with violacein pathway genes and the CRISPR system with constitutive dCas9 expression  
9 were grown in SC medium containing 5% galactose. After 3 days at 30 °C, approximately 2 mL  
10 of yeast cultures were harvested and the cells were collected and suspended in 250 µL of  
11 methanol, boiled at 95 °C for 15 minutes, and vortexed twice during the incubation. Solutions  
12 were centrifuged twice to remove cell debris, and the products from violacein pathway (i.e.,  
13 violacein, proviolacein, deoxyviolacein, and prodeoxyviolacein) in the supernatant were  
14 analyzed by HPLC on an Agilent Rapid Resolution SB-C18 column as described previously,  
15 measuring absorbance at 565 nm<sup>42</sup>.

16 **Code availability.** We claim that the code mentioned in this study is available within the article's  
17 Supplementary Information files (Supplementary Software) and at  
18 <https://sites.google.com/a/vt.edu/biomolecular-engineering-lab/> as a MATLAB package file  
19 (MathWorks Inc.).

20 **Data availability.** All data generated or analyzed during this study are included in this published  
21 article and its Supplementary Information files.

22 **Acknowledgement**

1 We thank the Writing Center in Virginia Tech for improving the language of the paper. This  
2 study was supported by start-up fund (#175323) and the ICTAS Junior Faculty Award from  
3 Virginia Tech.

#### 4 **Author contributions**

5 X.F. contributed to the initial idea of this project. J.S., C.A., and B.F. contributed to the  
6 molecular biology experiments and data screening. W.G. and X.F. contributed to the  
7 computational modeling and analysis. J.S. and W.G. contributed to the experimental validation  
8 and violacein pathway showcase. W.G. and M.P. contributed to the offline software development.  
9 J.S., W.G., and X.F. contributed to the manuscript preparation and revision.

#### 10 **Competing financial interests.**

11 The authors do not have any conflicts of financial interests.

#### 12 **Supplementary Information**

13 **Figure S1.** The OD<sub>600</sub> fold change for all the strains used for screening. (A) OD<sub>600</sub> fold-change  
14 for GFP screening set. (B) OD<sub>600</sub> fold-change for Sapphire screening set. (C) OD<sub>600</sub> fold-change  
15 for mCherry screening set. (D) OD<sub>600</sub> fold-change for Venus screening set. The results showed  
16 that no significant metabolic burden could be detected compared with wild type strain. The  
17 strains marked with (\*) indicated a significant inhibition of growth ( $p < 0.05$ ).

18 **Figure S2.** Linear model for predicting transcriptional regulation by dCas9-VP64. (A) Pearson's  
19 correlation coefficients between each guide RNA design parameters and the fold changes of gene  
20 expressions from the screening data of the four synthetic genetic cassettes. (B) Simulation  
21 accuracy of the linear model. (C) Validation of the linear model by comparing the simulated and

- 1 experimentally measured gene regulations on Eno2p-tdTomato cassette subject to dCas9-VP64
- 2 regulation.
- 3 **Figure S3.** Screenshot of CRISTINES software with a demo sequence.
- 4 **Table S1.** DNA sequences and plasmids used in this study.
- 5 **Table S2.** Strains used in this study.
- 6 **Table S3.** Key parameters of guide RNAs used in this study.
- 7 **Table S4.** Key parameters of guide RNAs used in validation experiments (Eno2p-tdTomato).
- 8 **Table S5.** Binary regression decision tree model.
- 9 **Table S6.** Measured and predicted concentrations of products from violacein pathway
- 10 **Supplementary Software.** CRISTINES toolbox.
- 11 **Figures and figure legends**

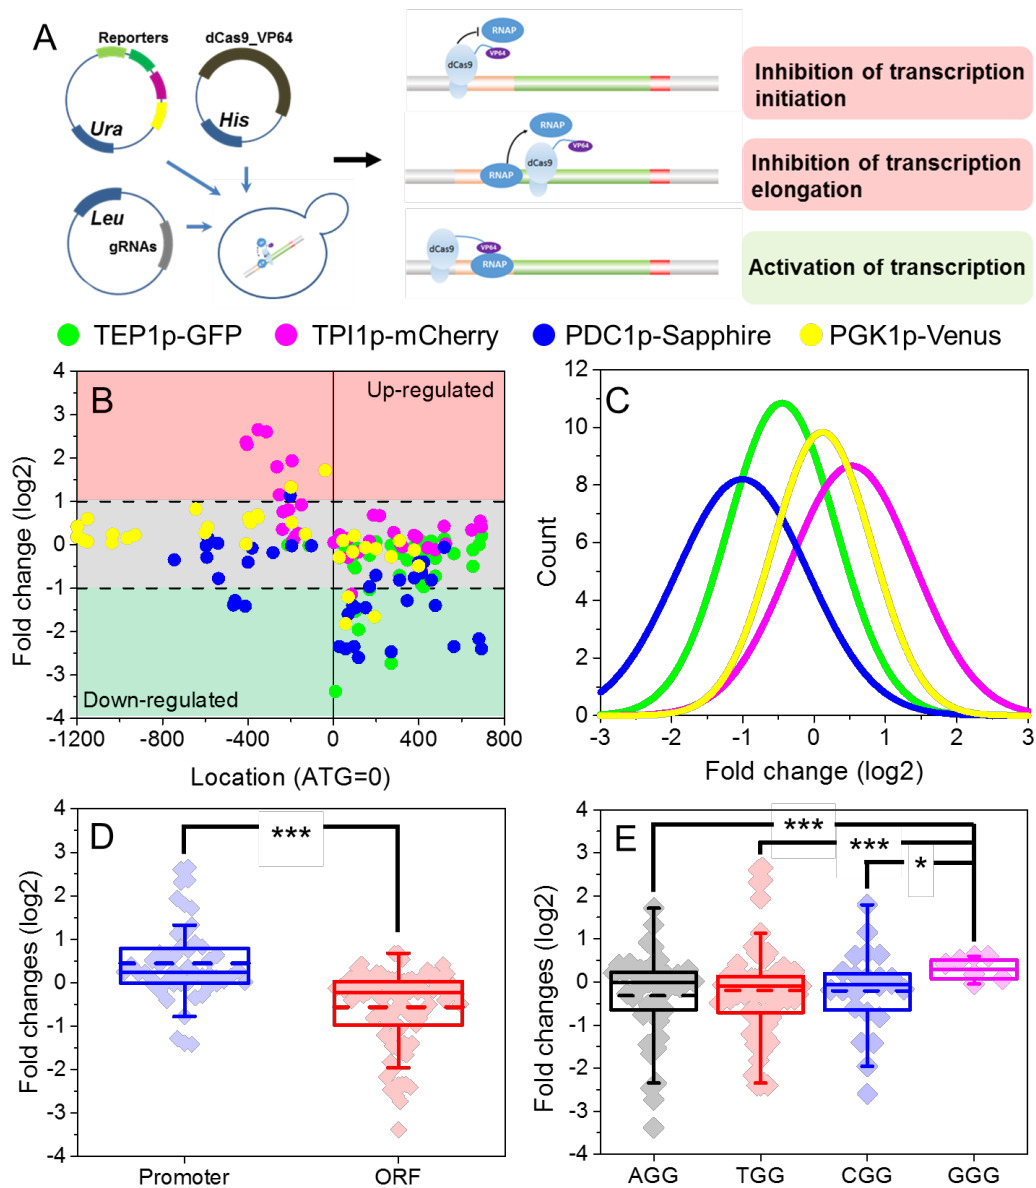

1  
 2 **Figure 1.** Multi-directional transcriptional regulation by dCas9-VP64. (A) Hypothesized  
 3 mechanism of transcriptional regulation by dCas9-VP64 to achieve both gene activation and  
 4 gene repression. (B) The measured fold changes of gene expressions from the four synthetic  
 5 genetic cassettes based on the PAM position. (C) The distributions of fold changes of gene  
 6 expressions. (D) Comparison of fold changes of gene expressions from two groups: PAM sites  
 7 located in the promoter regions and PAM sites located in the ORF region. \*\*\*:  $p < 0.01$ . (E)  
 8 Effects of different PAM sites on transcriptional regulation by dCas9-VP64. \*:  $p < 0.05$ .

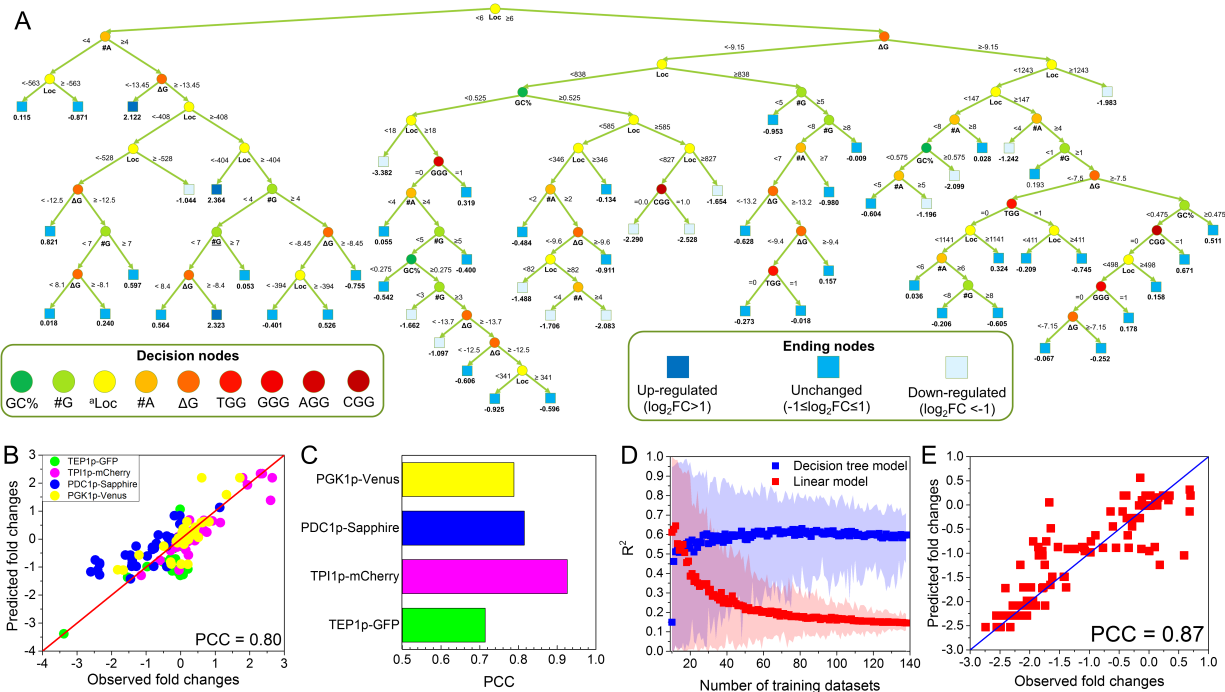

1  
 2 **Figure 2.** Data-driven model of transcriptional regulation by using dCas9-VP64. (A) Binary  
 3 regression tree model trained with all the screening data from the four synthetic genetic cassettes.  
 4 The regression tree model consisted of 58 decision nodes and used six design parameters of  
 5 guide RNAs as input. (B) and (C) Prediction accuracy of the regression tree model from ten-fold  
 6 cross validation. (D) Impact of data size on model prediction. For data-driven model, the  
 7 prediction increased with the inclusion of more datasets. For linear model, the prediction  
 8 decreased when more datasets were used. The shadow areas indicate the 95% confidence interval  
 9 of model prediction. (E) Validation of the regression tree model by comparing the simulated and  
 10 experimentally measured gene regulations on *Eno2p-tdTomato* cassette subject to dCas9-VP64  
 11 regulation.

12

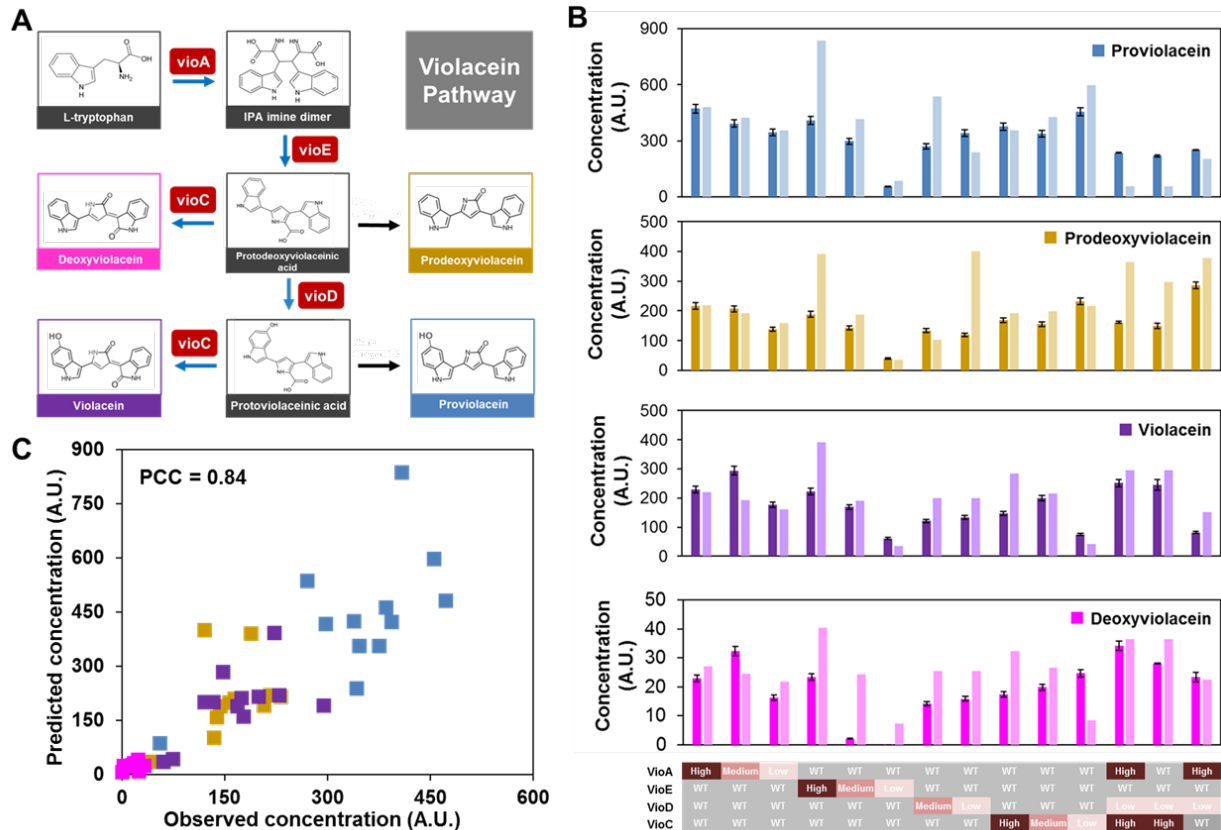

1  
2 **Figure 3.** Design dCas9-VP64 to reprogram metabolic fluxes in yeast. (A) Violacein pathway in  
3 yeast used in this study to demonstrate the programmable control of metabolic fluxes by using  
4 dCas9-VP64. Five enzymatic steps (vioA, vioB, vioC, vioD, and vioE) and two non-enzymatic  
5 steps led to four products from the violacein pathway: proviolacein, prodeoxyviolacein, violacein,  
6 and deoxyviolacein. (B) A panel of genes subject to regulation of dCas9-VP64 were chosen to  
7 control metabolic fluxes to various products from the violacein pathway. WT: wild type gene  
8 without any regulation; High: highly up-regulated gene expression by dCas9-VP64; Medium:  
9 medium-level up-regulated gene expression by dCas9-VP64; Low: down-regulated gene  
10 expression by dCas9-VP64. (C) The comparison between the model-predicted and  
11 experimentally measured products from the violacein pathway. The high correlation coefficient

- 1 (PCC=0.84) indicated that the data-driven model could accurately predict the effects of artificial
- 2 Cas9-based regulator on metabolic flux reprogramming.

## 1 References

- 2 1 Lee, S. K., Chou, H., Ham, T. S., Lee, T. S. & Keasling, J. D. Metabolic engineering of  
3 microorganisms for biofuels production: from bugs to synthetic biology to fuels. *Current*  
4 *Opinion in Biotechnology* **19**, 556-563,  
5 doi:<http://dx.doi.org/10.1016/j.copbio.2008.10.014> (2008).
- 6 2 Keasling, J. D. & Chou, H. Metabolic engineering delivers next-generation biofuels.  
7 *Nature biotechnology* **26**, 298-299, doi:10.1038/nbt0308-298 (2008).
- 8 3 Vuoristo, K. S., Mars, A. E., Sanders, J. P., Eggink, G. & Weusthuis, R. A. Metabolic  
9 Engineering of TCA Cycle for Production of Chemicals. *Trends Biotechnol* **34**, 191-197,  
10 doi:10.1016/j.tibtech.2015.11.002 (2016).
- 11 4 Chen, X. *et al.* Metabolic engineering of *Escherichia coli*: a sustainable industrial  
12 platform for bio-based chemical production. *Biotechnology advances* **31**, 1200-1223,  
13 doi:10.1016/j.biotechadv.2013.02.009 (2013).
- 14 5 Yadav, V. G. & Stephanopoulos, G. Metabolic Engineering: The Ultimate Paradigm for  
15 Continuous Pharmaceutical Manufacturing. *ChemSusChem* **7**, 1847-1853,  
16 doi:10.1002/cssc.201301219 (2014).
- 17 6 Khosla, C. & Keasling, J. D. Metabolic engineering for drug discovery and development.  
18 *Nature reviews. Drug discovery* **2**, 1019-1025, doi:10.1038/nrd1256 (2003).
- 19 7 Keasling, J. D. Manufacturing Molecules Through Metabolic Engineering. *Science* **330**,  
20 1355-1358, doi:10.1126/science.1193990 (2010).
- 21 8 Zadran, S. & Levine, R. D. Perspectives in metabolic engineering: understanding cellular  
22 regulation towards the control of metabolic routes. *Appl Biochem Biotechnol* **169**, 55-65,  
23 doi:10.1007/s12010-012-9951-x (2013).
- 24 9 Zalatan, J. G. *et al.* Engineering complex synthetic transcriptional programs with  
25 CRISPR RNA scaffolds. *Cell* **160**, 339-350, doi:10.1016/j.cell.2014.11.052 (2015).
- 26 10 McNerney, M. P., Watstein, D. M. & Styczynski, M. P. Precision metabolic engineering:  
27 The design of responsive, selective, and controllable metabolic systems. *Metabolic*  
28 *engineering* **31**, 123-131, doi:10.1016/j.ymben.2015.06.011 (2015).
- 29 11 Broun, P. Transcription factors as tools for metabolic engineering in plants. *Curr Opin*  
30 *Plant Biol* **7**, 202-209, doi:10.1016/j.pbi.2004.01.013 (2004).
- 31 12 Kim, J. & Reed, J. L. OptORF: Optimal metabolic and regulatory perturbations for  
32 metabolic engineering of microbial strains. *BMC Syst Biol* **4**, 53, doi:10.1186/1752-0509-  
33 4-53 (2010).
- 34 13 Cong, L. *et al.* Multiplex genome engineering using CRISPR/Cas systems. *Science* **339**,  
35 819-823, doi:10.1126/science.1231143 (2013).
- 36 14 Jiang, W., Bikard, D., Cox, D., Zhang, F. & Marraffini, L. A. RNA-guided editing of  
37 bacterial genomes using CRISPR-Cas systems. *Nature biotechnology* **31**, 233-239,  
38 doi:10.1038/nbt.2508 (2013).
- 39 15 Gilbert, L. A. *et al.* CRISPR-mediated modular RNA-guided regulation of transcription  
40 in eukaryotes. *Cell* **154**, 442-451, doi:10.1016/j.cell.2013.06.044 (2013).
- 41 16 Larson, M. H. *et al.* CRISPR interference (CRISPRi) for sequence-specific control of  
42 gene expression. *Nature protocols* **8**, 2180-2196, doi:10.1038/nprot.2013.132 (2013).
- 43 17 Qi, L. S. *et al.* Repurposing CRISPR as an RNA-guided platform for sequence-specific  
44 control of gene expression. *Cell* **152**, 1173-1183, doi:10.1016/j.cell.2013.02.022 (2013).



- 1 18 Farzadfard, F., Perli, S. D. & Lu, T. K. Tunable and multifunctional eukaryotic  
2 transcription factors based on CRISPR/Cas. *ACS Synth Biol* **2**, 604-613,  
3 doi:10.1021/sb400081r (2013).
- 4 19 Bikard, D. *et al.* Programmable repression and activation of bacterial gene expression  
5 using an engineered CRISPR-Cas system. *Nucleic acids research* **41**, 7429-7437,  
6 doi:10.1093/nar/gkt520 (2013).
- 7 20 Gao, Y. *et al.* Complex transcriptional modulation with orthogonal and inducible dCas9  
8 regulators. *Nature methods* **13**, 1043-1049, doi:10.1038/nmeth.4042 (2016).
- 9 21 Montague, T. G., Cruz, J. M., Gagnon, J. A., Church, G. M. & Valen, E. CHOPCHOP: a  
10 CRISPR/Cas9 and TALEN web tool for genome editing. *Nucleic acids research* **42**,  
11 W401-W407, doi:10.1093/nar/gku410 (2014).
- 12 22 Labun, K., Montague, T. G., Gagnon, J. A., Thyme, S. B. & Valen, E. CHOPCHOP v2: a  
13 web tool for the next generation of CRISPR genome engineering. *Nucleic acids research*  
14 **44**, W272-W276, doi:10.1093/nar/gkw398 (2016).
- 15 23 Russell, S. J. & Norvig, P. *Artificial Intelligence: A Modern Approach*. (Pearson  
16 Education, 2003).
- 17 24 Langley, P. The changing science of machine learning. *Machine Learning* **82**, 275-279  
18 (2011).
- 19 25 Mohri, M., Rostamizadeh, A. & Talwalkar, A. *Foundations of machine learning*. (MIT  
20 press, 2012).
- 21 26 Breiman, L., Friedman, J., Stone, C. J. & Olshen, R. A. *Classification and regression*  
22 *trees*. (CRC press, 1984).
- 23 27 Loh, W.-Y. & Shih, Y.-S. Split selection methods for classification trees. *Statistica sinica*,  
24 815-840 (1997).
- 25 28 Hoshino, T. Violacein and related tryptophan metabolites produced by *Chromobacterium*  
26 *violaceum*: biosynthetic mechanism and pathway for construction of violacein core.  
27 *Applied microbiology and biotechnology* **91**, 1463-1475, doi:10.1007/s00253-011-3468-z  
28 (2011).
- 29 29 Cho, S. W. *et al.* Analysis of off-target effects of CRISPR/Cas-derived RNA-guided  
30 endonucleases and nickases. *Genome research* **24**, 132-141, doi:10.1101/gr.162339.113  
31 (2014).
- 32 30 Haeussler, M. *et al.* Evaluation of off-target and on-target scoring algorithms and  
33 integration into the guide RNA selection tool CRISPOR. *Genome biology* **17**, 148,  
34 doi:10.1186/s13059-016-1012-2 (2016).
- 35 31 Delebecque, C. J., Lindner, A. B., Silver, P. A. & Aldaye, F. A. Organization of  
36 intracellular reactions with rationally designed RNA assemblies. *Science* **333**, 470-474,  
37 doi:10.1126/science.1206938 (2011).
- 38 32 Farasat, I. & Salis, H. M. A Biophysical Model of CRISPR/Cas9 Activity for Rational  
39 Design of Genome Editing and Gene Regulation. *PLoS Comput Biol* **12**, e1004724,  
40 doi:10.1371/journal.pcbi.1004724 (2016).
- 41 33 Nishimasu, H. *et al.* Crystal structure of Cas9 in complex with guide RNA and target  
42 DNA. *Cell* **156**, 935-949, doi:10.1016/j.cell.2014.02.001 (2014).
- 43 34 Jinek, M. *et al.* Structures of Cas9 endonucleases reveal RNA-mediated conformational  
44 activation. *Science* **343**, 1247997, doi:10.1126/science.1247997 (2014).
- 45 35 Slaymaker, I. M. *et al.* Rationally engineered Cas9 nucleases with improved specificity.  
46 *Science* **351**, 84-88, doi:10.1126/science.aad5227 (2016).

- 1 36 Jiang, F. *et al.* Structures of a CRISPR-Cas9 R-loop complex primed for DNA cleavage.  
2 *Science* **351**, 867-871, doi:10.1126/science.aad8282 (2016).
- 3 37 Jiang, F., Zhou, K., Ma, L., Gressel, S. & Doudna, J. A. STRUCTURAL BIOLOGY. A  
4 Cas9-guide RNA complex preorganized for target DNA recognition. *Science* **348**, 1477-  
5 1481, doi:10.1126/science.aab1452 (2015).
- 6 38 Hittinger, C. T. *Saccharomyces* diversity and evolution: a budding model genus. *Trends*  
7 *in genetics* : *TIG* **29**, 309-317, doi:10.1016/j.tig.2013.01.002 (2013).
- 8 39 Petzold, C. J., Chan, L. J. G., Nhan, M. & Adams, P. D. Analytics for Metabolic  
9 Engineering. *Frontiers in Bioengineering and Biotechnology* **3**, 135,  
10 doi:10.3389/fbioe.2015.00135 (2015).
- 11 40 Shao, Z., Zhao, H. & Zhao, H. DNA assembler, an in vivo genetic method for rapid  
12 construction of biochemical pathways. *Nucleic acids research* **27**, e16 (2009).
- 13 41 Shao, Z., Luo, Y. & Zhao, H. Rapid characterization and engineering of natural product  
14 biosynthetic pathways via DNA assembler. *Mol Biosyst* **7**, 1056-1059,  
15 doi:10.1039/c0mb00338g (2011).
- 16 42 Lee, M. E., Aswani, A., Han, A. S., Tomlin, C. J. & Dueber, J. E. Expression-level  
17 optimization of a multi-enzyme pathway in the absence of a high-throughput assay.  
18 *Nucleic acids research* **41**, 10668-10678, doi:10.1093/nar/gkt809 (2013).

19
